# Supplementary material for: Utilisation of the isobole methodology to study dietary peptide–drug and peptide–peptide interactive effects on dipeptidyl peptidase IV (DPP-IV) inhibition
Source: Royal Society of Chemistry journal article supplement (doi:10.1039/c4fo00883a), 2014-11-26
Supplement: c4fo00883a1.pdf [file c4fo00883a1.pdf]

## **Utilisation of the isobole methodology to study dietary peptide-drug and peptide-peptide interactive effects on dipeptidyl peptidase IV (DPP-IV) inhibition**

Alice B. Nongonierma<sup>a</sup> & Richard J. FitzGerald<sup>\*a</sup>

5

Supplementary data

Table S1: *In silico* analysis showing the occurrence of Trp-Lys, Trp-Pro, Trp-Arg, Trp-Leu and Ile-Pro-Ile-Gln-Tyr in food proteins.

| Origin                                                                                                       | Protein*                                   | Accession number <sup>†</sup> | Peptide occurrence in proteins <sup>‡</sup> |         |         |         |         |   |
|--------------------------------------------------------------------------------------------------------------|--------------------------------------------|-------------------------------|---------------------------------------------|---------|---------|---------|---------|---|
|                                                                                                              |                                            |                               | Ile-Pro-Ile-Gln-Tyr                         | Trp-Arg | Trp-Lys | Trp-Leu | Trp-Pro |   |
| Wheat ( <i>Triticum aestivum</i> )                                                                           | $\alpha'$ $\beta$ -gliadin                 | P02863                        | 0                                           | 0       | 0       | 0       | 0       |   |
|                                                                                                              | Glutenin, high molecular weight subunit 12 | P08488                        | 0                                           | 0       | 0       | 0       | 0       |   |
|                                                                                                              | Glutenin, low molecular weight subunit 1D1 | P10386                        | 0                                           | 0       | 0       | 0       | 0       |   |
|                                                                                                              | Large subunit RuBisCO                      | P11383                        | 0                                           | 1       | 1       | 0       | 0       |   |
|                                                                                                              | Small subunit RuBisCO                      | P26667                        | 0                                           | 0       | 1       | 0       | 1       |   |
| Barley ( <i>Hordeum vulgare</i> )                                                                            | B hordein                                  | Q40026                        | 0                                           | 0       | 0       | 0       | 1       |   |
|                                                                                                              | D hordein                                  | Q40054                        | 0                                           | 0       | 0       | 0       | 0       |   |
|                                                                                                              | $\gamma$ -hordein-3                        | P80198                        | 0                                           | 0       | 0       | 0       | 0       |   |
|                                                                                                              | Large subunit RuBisCO                      | P05698                        | 0                                           | 1       | 1       | 0       | 0       |   |
|                                                                                                              | Small subunit RuBisCO                      | Q40004                        | 0                                           | 0       | 1       | 0       | 1       |   |
| Oat ( <i>Avena sativa</i> )                                                                                  | Avenin                                     | P27919                        | 0                                           | 1       | 2       | 0       | 1       |   |
|                                                                                                              | 11S globulin                               | Q38779                        | 0                                           | 0       | 0       | 0       | 0       |   |
|                                                                                                              | 12S globulin                               | Q49257                        | 0                                           | 0       | 0       | 0       | 1       |   |
|                                                                                                              | Large subunit RuBisCO                      | P48684                        | 0                                           | 1       | 1       | 0       | 0       |   |
| Corn ( <i>Zea mays</i> )                                                                                     | Small subunit RuBisCO                      | Q9ZWG4                        | 0                                           | 0       | 1       | 0       | 1       |   |
|                                                                                                              | Large subunit RuBisCO                      | P00874                        | 0                                           | 1       | 1       | 0       | 0       |   |
|                                                                                                              | Small subunit RuBisCO                      | P05348                        | 0                                           | 0       | 1       | 0       | 1       |   |
| Rice ( <i>Oryza sativa</i> subsp. Japonica)                                                                  | Large subunit RuBisCO                      | P0C512                        | 0                                           | 1       | 1       | 0       | 0       |   |
|                                                                                                              | Small subunit RuBisCO                      | P18566                        | 0                                           | 0       | 1       | 0       | 1       |   |
| Sorghum ( <i>Sorghum vulgare</i> )                                                                           | Large subunit RuBisCO                      | A1E9T2                        | 0                                           | 1       | 1       | 0       | 0       |   |
|                                                                                                              | Small subunit RuBisCO                      | C5Y519                        | 0                                           | 0       | 1       | 0       | 1       |   |
| Soybean ( <i>Glycine hispida</i> )                                                                           | Basic 7S                                   | P13917                        | 0                                           | 1       | 0       | 0       | 0       |   |
|                                                                                                              | Glycinin                                   | P04347                        | 0                                           | 0       | 0       | 0       | 0       |   |
|                                                                                                              | $\beta$ -conglycinin, $\beta$ -chain       | P25974                        | 0                                           | 0       | 0       | 0       | 0       |   |
|                                                                                                              | $\beta$ -conglycinin, $\alpha$ -chain      | P13916                        | 0                                           | 0       | 0       | 0       | 1       |   |
|                                                                                                              | $\beta$ -conglycinin, $\alpha'$ -chain     | P11827                        | 0                                           | 0       | 0       | 0       | 0       |   |
| Quinoa ( <i>Chenopodium quinoa</i> )                                                                         | RuBisCO large chain                        | K4P448                        | 0                                           | 1       | 0       | 0       | 0       |   |
| Canola ( <i>Brassica napus</i> )                                                                             | Cruciferin                                 | P11090                        | 0                                           | 0       | 0       | 0       | 0       |   |
|                                                                                                              | Napin small chain                          | P17333                        | 0                                           | 0       | 0       | 1       | 0       |   |
|                                                                                                              | Napin large chain                          | P17333                        | 0                                           | 0       | 0       | 0       | 0       |   |
| Amaranth ( <i>Amaranthus hypochondriacus</i> )<br><i>Palmaria palmata</i><br>( <i>Rhododymenia palmata</i> ) | Large subunit RuBisCO                      | P16306                        | 0                                           | 1       | 1       | 0       | 0       |   |
|                                                                                                              | 50S ribosomal protein L31, chloroplastic   | Q5MIM5                        | 0                                           | 0       | 0       | 0       | 0       |   |
|                                                                                                              | PALPL Ribosomal protein 12                 | Q5MIL8                        | 0                                           | 0       | 0       | 0       | 0       |   |
|                                                                                                              | Allophycocyanin $\alpha$ chain             | M1UZ22                        | 0                                           | 1       | 1       | 0       | 0       |   |
|                                                                                                              | Allophycocyanin $\beta$ chain              | M1VJV1                        | 0                                           | 1       | 0       | 0       | 0       |   |
|                                                                                                              | Phycocyanin $\alpha$                       | I2FJU0                        | 0                                           | 1       | 1       | 0       | 0       |   |
|                                                                                                              | Phycocyanin $\beta$                        | I2FJT9                        | 0                                           | 0       | 1       | 0       | 1       |   |
|                                                                                                              | Phycocerythrin $\alpha$ subunit            | F2ZAL8                        | 0                                           | 0       | 0       | 0       | 0       |   |
|                                                                                                              | Phycocerythrin $\beta$ subunit             | F2ZAL7                        | 0                                           | 0       | 0       | 0       | 0       |   |
|                                                                                                              | RuBisCO large chain                        | Q9THF8                        | 0                                           | 0       | 0       | 0       | 0       |   |
|                                                                                                              | RuBisCO small chain                        | O98734                        | 0                                           | 0       | 0       | 0       | 0       |   |
|                                                                                                              | Small subunit RuBisCO                      | Q9XGX5                        | 0                                           | 0       | 1       | 0       | 1       |   |
|                                                                                                              | Chicken egg ( <i>Gallus gallus</i> )       | Ovalbumin                     | P01012                                      | 0       | 0       | 0       | 0       | 0 |
|                                                                                                              |                                            | Ovotransferrin                | P02789                                      | 0       | 0       | 0       | 0       | 0 |
|                                                                                                              |                                            | Ovomucoid                     | P01005                                      | 0       | 0       | 0       | 0       | 0 |
| Bovine milk ( <i>Bos taurus</i> )                                                                            | $\alpha_{s1}$ -casein                      | P02662                        | 0                                           | 0       | 0       | 0       | 0       |   |
|                                                                                                              | $\alpha_{s2}$ -casein                      | P02663                        | 0                                           | 0       | 0       | 0       | 0       |   |
|                                                                                                              | $\beta$ -casein                            | P02666                        | 0                                           | 0       | 0       | 0       | 0       |   |
|                                                                                                              | $\kappa$ -casein                           | P02668                        | 1                                           | 0       | 0       | 0       | 0       |   |
|                                                                                                              | $\beta$ -lactoglobulin                     | P02754                        | 0                                           | 0       | 0       | 0       | 0       |   |
|                                                                                                              | $\alpha$ -lactalbumin                      | P00711                        | 0                                           | 0       | 0       | 2       | 0       |   |
|                                                                                                              | Lactoferrin                                | P24627                        | 0                                           | 1       | 1       | 0       | 0       |   |
| Bovine meat ( <i>Bos taurus</i> )                                                                            | BSA                                        | P02769                        | 0                                           | 0       | 0       | 0       | 0       |   |
|                                                                                                              | Myosin-1                                   | Q9BE40                        | 0                                           | 1       | 1       | 2       | 1       |   |
|                                                                                                              | Myosin regulatory light chain 12B          | A4IF97                        | 0                                           | 0       | 0       | 0       | 0       |   |

|                                          |                                  |        |   |   |   |   |   |
|------------------------------------------|----------------------------------|--------|---|---|---|---|---|
| Pig ( <i>Sus scrofa</i> )                | Actin, cytoplasmic 1             | P60712 | 0 | 0 | 0 | 0 | 0 |
|                                          | Collagen $\alpha$ -1 (III) chain | P02459 | 0 | 0 | 1 | 0 | 0 |
|                                          | $\beta$ -actin                   | Q8SPK6 | 0 | 0 | 0 | 0 | 0 |
|                                          | Actin, $\alpha$ skeletal muscle  | P68137 | 0 | 0 | 0 | 0 | 0 |
|                                          | Myosin light chain               | Q29069 | 0 | 0 | 0 | 0 | 0 |
| Atlantic salmon ( <i>Salmo salar</i> )   | Myosin heavy chain               | Q29623 | 0 | 0 | 0 | 1 | 0 |
|                                          | Actin, cytoplasmic 1             | O42161 | 0 | 0 | 0 | 0 | 0 |
|                                          | Myosin regulatory light chain 2  | Q7ZZN0 | 0 | 0 | 0 | 0 | 0 |
|                                          | Slow myosin heavy chain          | Q2HXU3 | 0 | 0 | 0 | 1 | 0 |
| Chum salmon ( <i>Oncorhynchus keta</i> ) | Collagen Type XI $\alpha$ 2      | A7KE05 | 0 | 1 | 0 | 0 | 0 |
|                                          | Type 1 collagen $\alpha$ 2 chain | Q8UUJ4 | 0 | 0 | 0 | 0 | 0 |
|                                          | Actin                            | Q9PVN1 | 0 | 0 | 0 | 0 | 0 |
|                                          | $\beta$ -actin                   | J7ID80 | 0 | 0 | 0 | 0 | 0 |
| Tuna ( <i>Thunnus orientalis</i> )       | Myosin heavy chain               | Q8JIP5 | 0 | 2 | 1 | 2 | 1 |
|                                          | $\beta$ -actin                   | A9CM08 | 0 | 0 | 0 | 0 | 0 |
|                                          | Myosin heavy chain-1             | G9M5T1 | 0 | 1 | 1 | 2 | 1 |
|                                          | Myosin heavy chain-2             | G9M5T2 | 0 | 1 | 1 | 2 | 1 |

\*RuBisCO: Ribulose biphosphate carboxylase; BSA bovine serum albumin

†Accession number from UniProt database, data presented within this table is relative to the mature protein sequence

\*0: peptide not found within the protein sequence; 1 and 2: peptide found once or twice, respectively, within the protein sequence

**Table S2:** Inhibitory concentration inducing 50 % inhibition (IC<sub>50</sub>) for dipeptidyl peptidase IV (DPP-IV) and type of inhibition as determined by Lineweaver and Burk analysis.

| Compound            | IC <sub>50</sub> (μM) <sup>*</sup> | Type of inhibition <sup>‡</sup> |
|---------------------|------------------------------------|---------------------------------|
| Sitagliptin         | 0.037 ± 0.009 <sup>a</sup>         | competitive                     |
| Ile-Pro-Ile         | 3.6 ± 0.6 <sup>b</sup>             | substrate-type, competitive     |
| Ile-Pro-Ile-Gln-Tyr | 23.3 ± 1.4 <sup>c</sup>            | substrate-type, competitive     |
| Trp-Lys             | 33.1 ± 4.0 <sup>d</sup>            | non-competitive                 |
| Trp-Pro             | 33.3 ± 2.8 <sup>d</sup>            | non-competitive                 |
| Trp-Arg             | 34.9 ± 6.0 <sup>d</sup>            | non-competitive                 |
| Trp-Leu             | 53.9 ± 2.4 <sup>e</sup>            | true, competitive               |

\* Values represent the mean half maximum inhibitory concentration (IC<sub>50</sub>) ± confidence interval (P=0.05). Values with different superscript letters are significantly different (P < 0.05)

<sup>‡</sup>Type of DPP-IV inhibition as reported elsewhere [1,2](#)

- 10
1. A. B. Nongonierma and R. J. FitzGerald, *Food Funct.*, 2013, **4**, 1843-1849.
  2. L. Thomas, M. Eckhardt, E. Langkopf, M. Tadayyon, F. Himmelsbach and M. Mark, *Journal of Pharmacology and Experimental Therapeutics*, 2008, **325**, 175-182.
